# Supplementary material
Source: publisher site journal article supplement (https://spandidos-publications.com/76/downloadSupplementary)

Figure S1. High osmolarity has no effect on the phosphorylation level of Syk or JNK in H9c2 cells and neonatal cardiomyocytes. (A) Protein expression levels of p-Syk, p-JNK, NLRP3, caspase-1 p20 and mL-1 $\beta$  of H9c2 cells cultured under 5.5 or 25.0 mM glucose or high Mtol concentration (5.5 mM glucose + 19.5 mM Mtol) conditions; (B) densitometry was performed using ImageJ software. (C) Protein expression levels of p-Syk, p-JNK, NLRP3, p20 and mL-1 $\beta$  of neonatal cardiomyocytes cultured under 5.5 or 25.0 mM glucose or high Mtol concentration (5.5 mM glucose + 19.5 mM Mtol) conditions; (D) densitometry was performed using ImageJ software. Statistical significance was determined by one-way analysis of variance followed by Tukey's post hoc test. \* $P < 0.05$ , vs. 5.5 mM glucose. Syk, spleen tyrosine kinase; JNK, c-Jun N-terminal kinase; NLRP3, NLR family pyrin domain-containing 3; Mtol, mannitol; p, phosphorylated; caspase-1 p20; mL-1 $\beta$ , mature interleukin 1 $\beta$ .

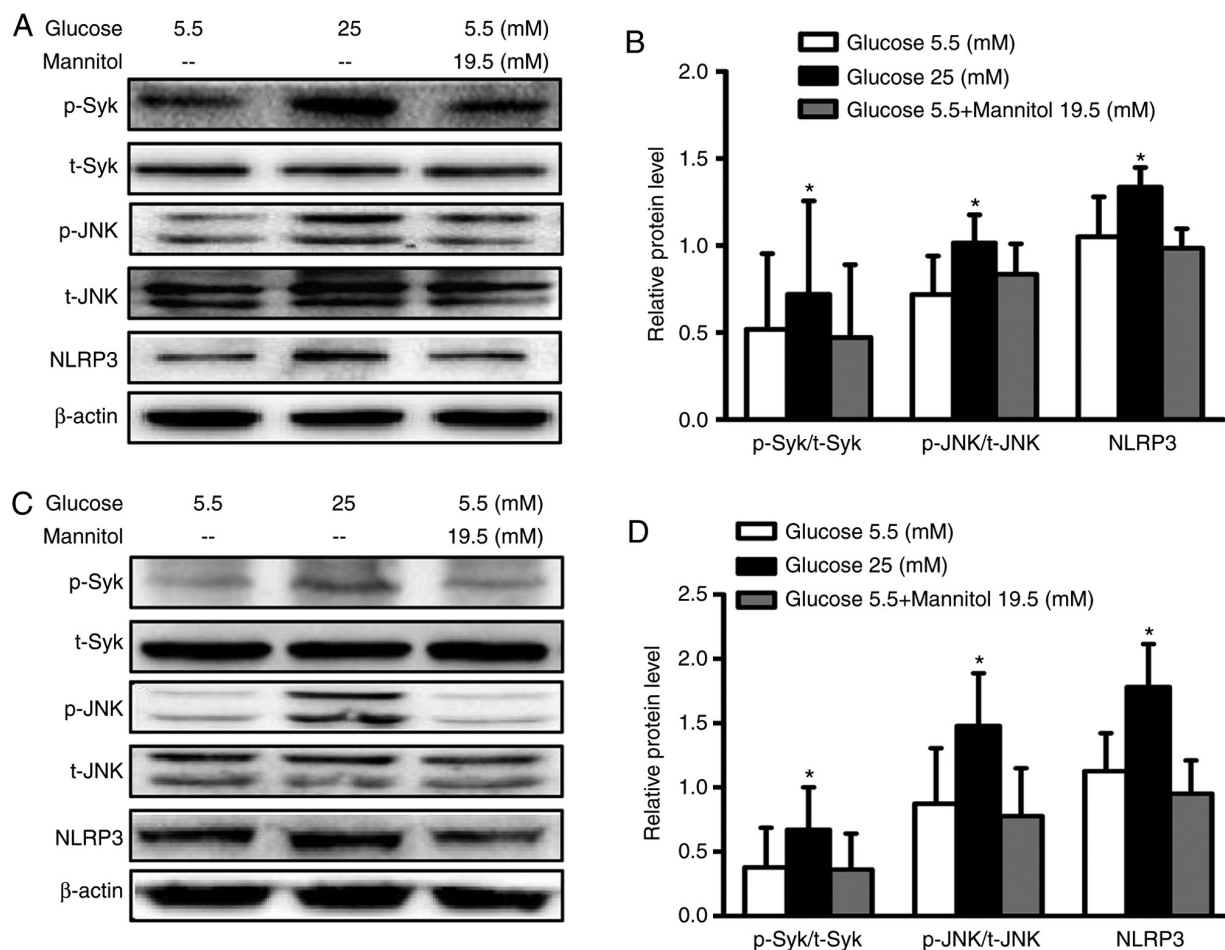

Supplement: Supplementary file 1 [file downloadSupplementary]
